# Supplementary material
Source: PubMed Central journal article supplement (PMC3977239)
Supplement: 1319963111_pnas.201319963SI.pdf [file 1319963111_pnas.201319963SI.pdf]

# Supporting Information

Sutherland et al. 10.1073/pnas.1319963111

## SI Materials and Methods

**Histology and Immunohistochemistry.** For histological analysis, lungs were inflated with ethanol-acetic acid-formalin (EAF) and fixed for 24 h in EAF. Fixed tissues were subsequently dehydrated, embedded in paraffin, and sections (4  $\mu$ m) prepared and stained by hematoxylin and eosin (H&E). For immunohistochemistry, tissue sections were rehydrated, blocked in BSA containing PBS, and sequentially incubated with specific primary antibodies and with biotinylated secondary antibodies (DAKO). Streptavidin-peroxidase (DAKO) or Powervision Poly-HRP (Leica Microsystems) was used for visualization and diaminobenzidine as a chromagen (DAKO). The following antibodies were used: anti-Clara cell antigen 10 (CC10) (goat polyclonal, 1:5,000), anti-high mobility group AT-hook 2 (Hmga2) (rabbit polyclonal, 1:1,000, BioCheck: 59170AP), anti-NK2 homeobox 1 (Nkx2-1) (mouse monoclonal, 1:1,000), anti-pro-Surfactant Protein C

(SPC) (rabbit polyclonal, 1:2,000, Chemicon), and anti-sex determining region Y-box 2 (Sox2) (rabbit polyclonal, 1:1,000, Millipore).

**Immunofluorescence Microscopy.** For immunofluorescence microscopy, Ad5-Cre-infected  $K-Ras^{lox-Stop-lox-G12D/+}$  lungs were inflated and fixed with EAF overnight. Fixed lungs were embedded in paraffin. For immunofluorescence, tissue sections were rehydrated, blocked in normal donkey serum containing PBS/0.2% tween-20, and incubated with specific primary antibodies and with Alexa Fluor-coupled secondary antibodies. Paraffin sections were stained with the following primary antibodies: goat anti-CC10 (1:200; Santa Cruz: sc-9972) and rabbit anti-pro-SPC (1:1,000; Chemicon; AB3786). Alexa Fluor-coupled secondary antibodies (Invitrogen) were used at a 1:200 dilution. Images were captured on a Leica SP5C Spectral Confocal Laser Scanning Microscope.

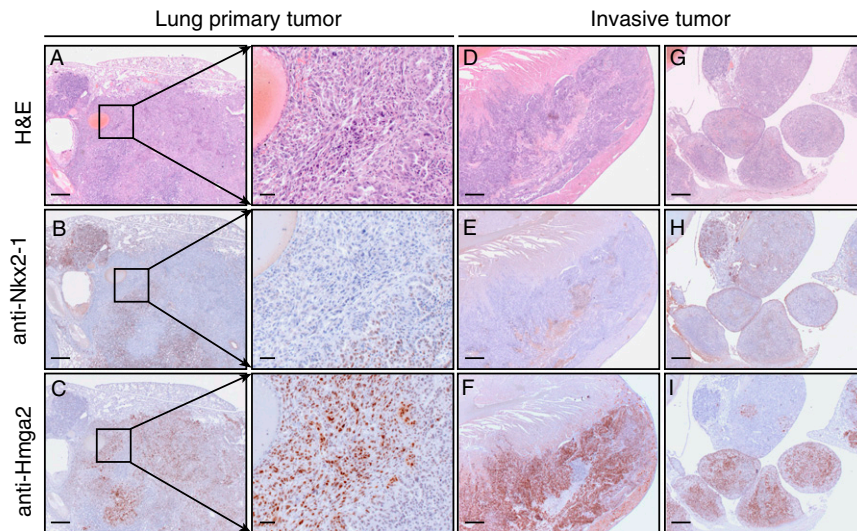

**Fig. S1.** Poorly differentiated and invasive lung tumors exhibit high Hmga2 expression. (A–C) Microphotographs of serial sections of a representative poorly differentiated lung carcinoma from a  $K-Ras^{LSL-G12D/+}$ ; tumor suppressor gene p53 ( $Trp53$ )<sup>F/F</sup> mouse examined 177 d following Ad5-CC10-Cre infection. (A) H&E-stained section showing pleomorphism of the tumor with the areas of necrosis and poor differentiation such as spindle cell transformation and trabecular and irregular glandular structures (*Inset*). Immunostainings of Nkx2-1 (B) and Hmga2 (C) showing complementary staining patterns in the areas of poor differentiation with no Nkx2-1 staining that is accompanied by strong staining of Hmga2 (*Insets*). (D–F) Micrographs of serial sections of an invasive lung carcinoma in myocardium from a  $K-Ras^{LSL-G12D/+}$ ;  $Trp53^{F/F}$  mouse examined 177 d following Ad5-CC10-Cre infection. (D) H&E staining. Immunostainings of Nkx2-1 (E) and Hmga2 (F) showing negative staining of Nkx2-1 but strong positive staining of Hmga2. (G–I) Microphotographs of serial sections of an invasive lung carcinoma in the thoracic cavity from a  $K-Ras^{LSL-G12D/+}$ ;  $Trp53^{F/F}$  mouse analyzed 177 d following Ad5-CC10-Cre infection. (D) H&E staining. Immunostainings of Nkx2-1 (H) and Hmga2 (I) showing negative staining of Nkx2-1 but strong positive staining of Hmga2. (Scale bar in A–C, 500  $\mu$ m; *Insets*, 50  $\mu$ m; D–I, 500  $\mu$ m.)

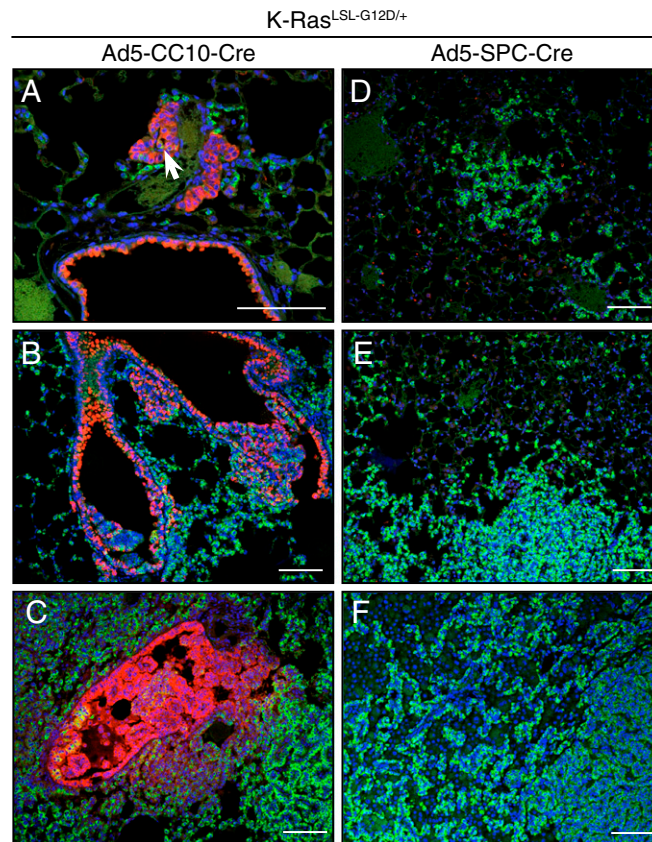

**Fig. S2.** Bronchioalveolar stem cells (BASCs) are not the sole cancer-initiating cell of K-RasG12D-induced transformation. (A–C) Sections of *K-Ras*<sup>LSL-G12D/+</sup> mouse lungs at various stages following Ad5-CC10-Cre infection were stained with anti-CC10 (red) and pro-SPC (green). (A) Coimmunofluorescence (co-IF) staining of initial lesions detects rare CC10<sup>+</sup>SPC<sup>+</sup> cells (arrows) at the bronchioalveolar duct junction (BADJ). (B) Papillary hyperplasia at the BADJ consists of rare CC10<sup>+</sup>SPC<sup>+</sup> BASCs and CC10- and SPC single-positive cells. (C) Bronchiolar and alveolar hyperplasia stain positive for CC10 and pro-SPC, respectively. (D–F) A time course of adenocarcinoma progression in *K-Ras*<sup>LSL-G12D/+</sup> mice following Ad5-SPC-Cre infection shows no involvement of CC10<sup>+</sup>SPC<sup>+</sup> BASCs following K-RasG12D activation in SPC-expressing cells. (D) Alveolar hyperplasia consists of SPC<sup>+</sup> cells. (E) Normal BADJ (arrow) and SPC<sup>+</sup> alveolar adenomatous hyperplasia in the periperal lung and (F) an SPC<sup>+</sup> adenocarcinoma. (Scale bar in A, 50  $\mu$ M; B–F, 100  $\mu$ M.)

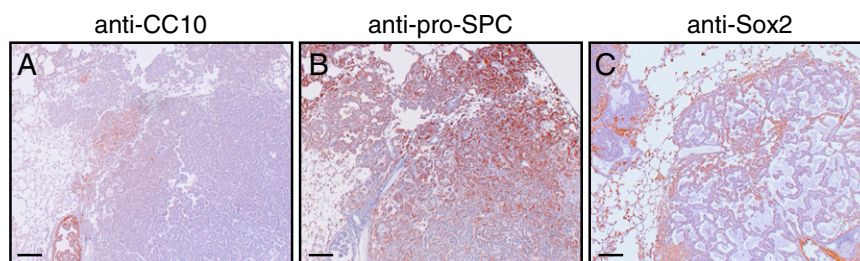

**Fig. S3.** Sox2 expression is partially lost in more progressed lesions. Immunohistochemical staining of lung tissue sections from a *K-Ras*<sup>LSL-G12D/+</sup> mouse 491 d following Ad5-CC10-Cre infection. (A) Staining for the Clara cell maker, CC10; (B) staining for the alveolar type 2 cell marker, pro-SPC; and (C) staining for Sox2. (Scale bar in A–C, 200  $\mu$ M.)

**Table S1. Overview of the number of  $K-Ras^{LSL-G12D/+}$  mice subjected to the experiment**

| Time point, wk | $K-Ras^{LSL-G12D/+}$ mice |              |
|----------------|---------------------------|--------------|
|                | Adenovirus                |              |
|                | Ad5-SPC-Cre               | Ad5-CC10-Cre |
| 8              | 4                         | 4            |
| 12             | 5                         | 3            |
| 18             | 5                         | 7            |
| 24             | 5                         | 4            |
| 32             | 3                         | 4            |
| 32-88          | 5                         | 8            |

**Table S2. Overview of the number of  $K-Ras^{LSL-G12D/+};Trp53^{F/F}$  mice subjected to the experiment**

| Time point, wk | $K-Ras^{LSL-G12D/+};Trp53^{F/F}$ mice |              |
|----------------|---------------------------------------|--------------|
|                | Adenovirus                            |              |
|                | Ad5-SPC-Cre                           | Ad5-CC10-Cre |
| 4              | 4                                     | 4            |
| 8              | 3                                     | 3            |
| 18             | 2                                     | 6            |
| 18-46          | 8                                     | 9            |
